# Supplementary material
Source: PubMed Central journal article supplement (PMC8009610)
Supplement: mmc1.pdf [file mmc1.pdf]

# THE LANCET

## Respiratory Medicine

### **Supplementary appendix**

This appendix formed part of the original submission and has been peer reviewed. We post it as supplied by the authors.

Supplement to: Clougherty JE, Kinnee EJ, Cardet JC, et al. Geography, generalisability, and susceptibility in clinical trials. *Lancet Respir Med* 2021; published online Feb 1. [http://dx.doi.org/10.1016/S2213-2600\(21\)00046-1](http://dx.doi.org/10.1016/S2213-2600(21)00046-1).

## Declaration of interests (continued)

All following declarations are outside of the submitted work

JCC reports personal fees from AstraZeneca and Genentech. DM reports grants from GlaxoSmithKline, AstraZeneca, Teva, Boehringer-Ingelheim, and Genentech. LB reports personal fees from GlaxoSmithKline, Genentech/Novartis, DBV Technologies, AstraZeneca, WebMD/Medscape, Sanofi/Regeneron, Vectura, and Circassia; and personal fees and non-financial support from Merck, Teva, and Boehringer Ingelheim. MC receives grant funding from the NIH, American Lung Association, and Patient-Centered Outcomes Research Institute (PCORI); pharmaceutical grant funding from AstraZeneca, GlaxoSmithKline, Novartis, Pulmatrix, Sanofi-Aventis, and Shionogi; is a consultant for Genentech, Teva, Sanofi-Aventis, Novartis; is a speaker for AstraZeneca, Genentech, GlaxoSmithKline, Regeneron, Sanofi, and Teva; and receives royalties from Elsevier. JFC reports grants and personal fees from Cystic Fibrosis Foundation; and personal fees from the American Board of Pediatrics. EI reports personal fees from AB Science; grants from Gossamer Bio; grants and personal fees from Amgen, AstraZeneca, Avillion, Novartis; personal fees from Biometry, Equillium, Merck, 4D Pharma, Pneuma Respiratory, PPS Health, Regeneron, Sanofi Genzyme, Sienna Biopharmaceutical; grants, personal fees, and non-financial support from Genentech; grants and non-financial support from Circassia; personal fees and non-financial support from GlaxoSmithKline and Teva; non-financial support from Boehringer Ingelheim; and other support from Vorso Corp. DJJ reports grants from the NIH National Institute of Allergy and Infectious Diseases; grants and personal fees from GlaxoSmithKline; and personal fees from Sanofi, Regeneron, Novartis, AstraZeneca, Vifor Pharma, and Pfizer. MK reports grants from the NIH, Sanofi, ALA, Chiesi, and AstraZeneca; and other support from Elsevier, Sanofi, AstraZeneca, and RaeSedo. SCL reports grants from the NIH-NHLBI Asthma Clinical Research Network. RFL reports personal fees from Food Allergy Research and Education Network and Siolta. FDM reports grants from the NIH NHLBI, NIH National Institute of Environmental Health Sciences, NIH National Institute of Allergy and Infectious Diseases, NIH Office of Director, and Johnson & Johnson; and personal fees from Copeval. WM reports grants and personal fees from Cystic Fibrosis Foundation; grants from University of Washington Seattle Children's Hospital, NIH NHLBI, NIH National Institute of Allergy and Infectious Diseases, and Indiana University; and personal fees from the American College of Chest Physicians and the American Thoracic Society. VEO reports personal fees from Regeneron and Sanofi. JAP reports other support from GlaxoSmithKline, Merck, Boehringer-Ingelheim, and Teva. JS reports grants from the NIH National Center for Advancing Translational Sciences and NIH NHLBI; personal fees from Regeneron/Sanofi-Genzyme; and other support from Rafael Rivera III Memorial Foundation for Asthma Research and PulmOne Advanced Medical Devices. MEW reports grants and personal fees from Novartis, Sanofi, and Cohero Health; personal fees from Regeneron, Genentech, Sentien, Restorbio, Equillium, and Genzyme; grants, personal fees, and non-financial support from Teva and AstraZeneca; personal fees and non-financial support from Boehringer Ingelheim; and grants and personal fees from GlaxoSmithKline. SW reports grants and personal fees from AstraZeneca, GlaxoSmithKline, Sanofi Genzyme, and Novartis; and grants from Knopp, Boehringer Ingelheim, and Teva. SRW reports consultancy fees from AstraZeneca, Regeneron, CHEST Foundation, and Sanofi.
